# Supplementary material for: Predialysis Potassium Variability and Postdialysis Mortality in Patients With Advanced CKD
Source: PubMed Central journal article supplement — Kidney Int Rep. 2021 Jan 14;6(2):366–80. doi: 10.1016/j.ekir.2020.11.022 (PMC7879127; doi:10.1016/j.ekir.2020.11.022), 2021-01-14
Supplement: mmc1.pdf [file mmc1.pdf]

## Supplementary materials

**Table S1.** Univariable Cox regression assessing association between exposure/confounders (over 3-year prelude) and all-cause mortality within 6-months following dialysis initiation

| Exposure/confounders                            | Reference | Hazard ratio (95% CI) |
|-------------------------------------------------|-----------|-----------------------|
| K variability (0.31-<0.41)                      | <0.31     | 0.88 (0.81-0.95)*     |
| K variability (0.41-<0.52)                      | <0.31     | 0.87 (0.80-0.94)*     |
| K variability ( $\geq$ 0.52)                    | <0.31     | 0.94 (0.87-1.02)      |
| K intercept (unit=1 mEq/L)                      |           | 0.98 (0.92-1.05)      |
| K slope (unit=0.1 mEq/L/year)                   |           | 0.96 (0.95-0.98)*     |
| Age (unit=10 years)                             |           | 1.64 (1.59-1.69)*     |
| Sex (Males)                                     | Female    | 1.81 (1.37-2.37)*     |
| Race (Black)                                    | White     | 0.53 (0.49-0.57)*     |
| Race (Other)                                    | White     | 0.52 (0.42-0.65)*     |
| Marital status (Unmarried)                      | Married   | 0.89 (0.84-0.95)*     |
| Smoking status (Current)                        | Never     | 1.03 (0.95-1.10)      |
| Smoking status (Past)                           | Never     | 1.22 (1.14-1.31)*     |
| Congestive heart failure                        |           | 1.93 (1.81-2.07)*     |
| Peripheral vascular disease                     |           | 1.62 (1.52-1.71)*     |
| Cerebrovascular disease                         |           | 1.59 (1.50-1.68)*     |
| Lung disease                                    |           | 1.74 (1.64-1.85)*     |
| Peptic ulcer disease                            |           | 1.47 (1.35-1.59)*     |
| Paraplegia/Hemiplegia                           |           | 1.28 (1.15-1.43)*     |
| Anemia                                          |           | 1.25 (1.15-1.36)*     |
| Atrial fibrillation                             |           | 2.22 (1.09-2.35)*     |
| Hypertension                                    |           | 0.59 (0.47-0.76)*     |
| Ischemic heart disease                          |           | 1.81 (1.69-1.94)*     |
| Diabetes                                        |           | 0.88 (0.82-0.94)*     |
| Malignancies                                    |           | 1.64 (1.55-1.74)*     |
| Charlson comorbidity index (unit=1 comorbidity) |           | 1.14 (1.13-1.15)*     |
| Body Mass Index (unit=5 kg/m <sup>2</sup> )     |           | 0.82 (0.80-0.84)*     |
| Length of hospitalizations (unit=7 days)        |           | 1.02 (1.02-1.02)*     |
| Vascular access (Catheter)                      | Other     | 2.75 (2.52-3.0)*      |
| RAASi                                           |           | 0.83 (0.78-0.89)*     |
| SPS                                             |           | 0.88 (0.82-0.94)*     |
| Loop diuretics                                  |           | 0.88 (0.82-0.94)*     |
| K sparing diuretics                             |           | 1.42 (1.33-1.53)*     |
| Digoxin                                         |           | 2.32 (2.14-2.51)*     |
| Beta blocker                                    |           | 0.89 (0.83-0.96)*     |
| Calcium channel blockers                        |           | 0.47 (0.44-0.50)*     |
| Insulin                                         |           | 0.76 (0.72-0.81)*     |
| Oral hypoglycemics                              |           | 0.93 (0.88-0.99)*     |

|                                           |                   |
|-------------------------------------------|-------------------|
| Calcineurin inhibitors                    | 1.03 (0.84-1.26)  |
| Trimethoprim                              | 1.49 (1.33-1.64)* |
| Azole antifungals                         | 1.01 (0.95-1.08)  |
| eGFR (unit=5 ml/min/1.73 m <sup>2</sup> ) | 1.09 (1.09-1.10)* |
| K measurements (unit=5 measurements)      | 1.00 (0.99-1.01)  |

---

\* p < 0.05

K: potassium; eGFR: estimated glomerular filtration rate; RAASi: renal-angiotensin-aldosterone system inhibitors;  
SPS: sodium polystyrene sulphonate

**Table S2.** The association of potassium variability quartiles over 3-year prelude with 6-month all-cause mortality following dialysis initiation.

|         | <b>Potassium variability quartiles (mEq/L)</b> |                                    |                                    |                            |
|---------|------------------------------------------------|------------------------------------|------------------------------------|----------------------------|
|         | <b>&lt;0.31<br/>(n=8,421)</b>                  | <b>0.31-&lt;0.41<br/>(n=8,757)</b> | <b>0.41-&lt;0.52<br/>(n=8,695)</b> | <b>≥0.52<br/>(n=8,294)</b> |
| Events  | 1,421 (16.9)                                   | 1,322 (15.1)                       | 1,280 (14.7)                       | 1,339 (16.1)               |
| Model 1 | Reference                                      | 0.88 (0.81-0.95)                   | 0.88 (0.81-0.95)                   | 0.96 (0.88-1.04)           |
| Model 2 | Reference                                      | 1.05 (0.97-1.14)                   | 1.15 (1.06-1.25)                   | 1.32 (1.22-1.43)           |
| Model 3 | Reference                                      | 1.04 (0.96-1.13)                   | 1.08 (0.99-1.17)                   | 1.15 (1.06-1.25)           |
| Model 4 | Reference                                      | 1.05 (0.96-1.14)                   | 1.05 (0.96-1.14)                   | 1.09 (0.99-1.19)           |
| Model 5 | Reference                                      | 1.08 (0.99-1.17)                   | 1.09 (1.01-1.19)                   | 1.14 (1.03-1.25)           |

Data are presented as number (percentage) or hazard ratio (95% CI) unless otherwise specified.

Models are as follows: model 1: adjusted for potassium intercept and slope over 3-year prelude; model 2: adjusted for variables in model 1 plus demographics (age, sex, race, marital status, smoking status); model 3: adjusted for variables in model 2 plus comorbidities (congestive heart failure, peripheral vascular disease, cerebrovascular disease, lung disease, peptic ulcer disease, paraplegia/hemiplegia, anemia, atrial fibrillation, hypertension, ischemic heart disease, diabetes, liver disease, malignancies), Charlson comorbidity index, cumulative length of hospitalizations, and BMI over the 3-year prelude period, and vascular access type; model 4: adjusted for variables in model 3 plus medications (RAASi, Na-polystyrene sulphonate, loop diuretics, potassium sparing diuretics, digoxin, beta blockers, calcium channel blockers, insulin, oral hypoglycemics, calcineurin inhibitors, trimethoprim,azole antifungals); model 5: adjusted for variables in model 4 plus average eGFR and number of potassium measurements over the 3-year prelude period.

BMI: body mass index; CI: confidence interval; eGFR: estimated glomerular filtration rate; RAASi: renal-angiotensin-aldosterone system inhibitors

**Table S3.** Adjusted hazard (95% CI) of 6-month all-cause mortality following dialysis initiation with potassium variability quartiles over the 3-year prelude in selected subgroups

| Subgroup                                         |         | Potassium variability quartiles (mEq/L) |                         |                         |                    | p-value |
|--------------------------------------------------|---------|-----------------------------------------|-------------------------|-------------------------|--------------------|---------|
|                                                  |         | <0.31<br>(n=8,421)                      | 0.31-<0.41<br>(n=8,757) | 0.41-<0.52<br>(n=8,695) | ≥0.52<br>(n=8,294) |         |
|                                                  | Events  | 1,421 (16.9)                            | 1,322 (15.1)            | 1,280 (14.7)            | 1,339 (16.1)       |         |
| Age < 65 years                                   | Model 5 | Reference                               | 1.13 (0.92-1.38)        | 1.22 (0.99-1.49)        | 1.33 (1.08-1.64)   |         |
| Age ≥ 65 years                                   | Model 5 | Reference                               | 1.04 (0.95-1.13)        | 1.04 (0.94-1.14)        | 1.03 (0.92-1.14)   | 0.04    |
| Race: White                                      | Model 5 | Reference                               | 1.09 (1.00-1.20)        | 1.10 (1.00-1.22)        | 1.11 (0.99-1.23)   |         |
| Race: African American                           | Model 5 | Reference                               | 1.01 (0.82-1.25)        | 1.09 (0.87-1.35)        | 1.17 (0.93-1.48)   | 0.21    |
| Diabetes                                         | Model 5 | Reference                               | 1.08 (0.99-1.19)        | 1.07 (0.96-1.18)        | 1.11 (0.99-1.24)   |         |
| No Diabetes                                      | Model 5 | Reference                               | 1.05 (0.89-1.25)        | 1.17 (0.98-1.39)        | 1.19 (0.98-1.44)   | 0.24    |
| Congestive heart failure                         | Model 5 | Reference                               | 1.06 (0.96-1.16)        | 1.08 (0.98-1.19)        | 1.08 (0.98-1.21)   |         |
| No Congestive heart failure                      | Model 5 | Reference                               | 1.16 (0.98-1.39)        | 1.16 (0.96-1.39)        | 1.31 (1.07-1.59)   | 0.33    |
| RAASi                                            | Model 5 | Reference                               | 1.09 (0.99-1.20)        | 1.11 (1.00-1.23)        | 1.15 (1.03-1.28)   |         |
| No RAASi                                         | Model 5 | Reference                               | 1.04 (0.89-1.22)        | 1.06 (0.89-1.26)        | 1.09 (0.91-1.32)   | 0.94    |
| SPS                                              | Model 5 | Reference                               | 1.30 (0.93-1.83)        | 1.29 (0.93-1.77)        | 1.33 (0.97-1.83)   |         |
| No SPS                                           | Model 5 | Reference                               | 1.06 (0.98-1.16)        | 1.08 (0.98-1.19)        | 1.11 (1.00-1.24)   | 0.79    |
| eGFR < 15 ml/min <sup>2</sup> /1.73 <sup>2</sup> | Model 5 | Reference                               | 1.07 (0.79-1.43)        | 1.11 (0.81-1.51)        | 1.09 (0.79-1.54)   |         |
| eGFR ≥ 15 ml/min <sup>2</sup> /1.73 <sup>2</sup> | Model 5 | Reference                               | 1.06 (0.97-1.15)        | 1.04 (0.95-1.14)        | 1.08 (0.98-1.19)   | 0.95    |
| K measurements ≤ 19                              | Model 5 | Reference                               | 1.12 (1.02-1.24)        | 1.13 (1.01-1.26)        | 1.13 (0.99-1.27)   |         |
| K measurements > 19                              | Model 5 | Reference                               | 0.93 (0.77-1.12)        | 0.97 (0.80-1.17)        | 1.02 (0.84-1.24)   | 0.23    |

Data are presented as hazard ratio (95% CI) unless otherwise specified.

Model adjusted for potassium intercept and slope over 3-year prelude, demographics (age, sex, race, marital status, smoking status), comorbidities (congestive heart failure, peripheral vascular disease, cerebrovascular disease, lung disease, peptic ulcer disease, paraplegia/hemiplegia, anemia, atrial fibrillation, hypertension, ischemic heart disease, diabetes, liver disease, malignancies), Charlson comorbidity index, cumulative length of hospitalizations, BMI over the 3-year prelude period, vascular access type, medications (RAASi, Na-polystyrene sulphonate, loop diuretics, potassium sparing diuretics, digoxin, beta blockers, calcium channel blockers, insulin, oral hypoglycemics, calcineurin inhibitors, trimethoprim, azole antifungals), average eGFR and number of potassium measurements over the 3-year prelude period.

BMI: body mass index; CI: confidence interval; CHF: congestive heart failure; DM: diabetes mellitus; eGFR: estimated glomerular filtration rate; K: potassium; SPS: Na-polystyrene sulphonate; RAASi: renal-angiotensin-aldosterone system inhibitors

**Table S4.** The association of potassium variability quartiles over the 3-year prelude with 1-month all-cause mortality following dialysis initiation.

|         | <b>Potassium variability quartiles (mEq/L)</b> |                                    |                                    |                            |
|---------|------------------------------------------------|------------------------------------|------------------------------------|----------------------------|
|         | <b>&lt;0.31<br/>(n=8,421)</b>                  | <b>0.31-&lt;0.41<br/>(n=8,757)</b> | <b>0.41-&lt;0.52<br/>(n=8,695)</b> | <b>≥0.52<br/>(n=8,294)</b> |
| Events  | 274 (3.3)                                      | 269 (3.1)                          | 233 (2.7)                          | 237 (2.9)                  |
| Model 1 | Reference                                      | 0.95 (0.78-1.15)                   | 0.88 (0.72-1.07)                   | 0.87 (0.71-1.06)           |
| Model 2 | Reference                                      | 1.15 (0.95-1.39)                   | 1.16 (0.95-1.42)                   | 1.23 (0.99-1.50)           |
| Model 3 | Reference                                      | 1.14 (0.94-1.38)                   | 1.09 (0.89-1.34)                   | 1.08 (0.88-1.33)           |
| Model 4 | Reference                                      | 1.13 (0.93-1.38)                   | 1.06 (0.86-1.31)                   | 1.04 (0.83-1.29)           |
| Model 5 | Reference                                      | 1.17 (0.96-1.42)                   | 1.11 (0.89-1.37)                   | 1.08 (0.86-1.36)           |

Data are presented as number (percentage) or hazard ratio (95% CI) unless otherwise specified.

Models are as follows: model 1: adjusted for potassium intercept and slope over 3-year prelude; model 2: adjusted for variables in model 1 plus demographics (age, sex, race, marital status, smoking status); model 3: adjusted for variables in model 2 plus comorbidities (congestive heart failure, peripheral vascular disease, cerebrovascular disease, lung disease, peptic ulcer disease, paraplegia/hemiplegia, anemia, atrial fibrillation, hypertension, ischemic heart disease, diabetes, liver disease, malignancies), Charlson comorbidity index, cumulative length of hospitalizations, and BMI over the 3-year prelude period, and vascular access type; model 4: adjusted for variables in model 3 plus medications (RAASi, Na-polystyrene sulphonate, loop diuretics, potassium sparing diuretics, digoxin, beta blockers, calcium channel blockers, insulin, oral hypoglycemics, calcineurin inhibitors, trimethoprim, azole antifungals); model 5: adjusted for variables in model 4 plus average eGFR and number of potassium measurements over the 3-year prelude period.

BMI: body mass index; CI: confidence interval; eGFR: estimated glomerular filtration rate; RAASi: renal-angiotensin-aldosterone system inhibitors

**Table S5.** The association of potassium variability quartiles over the 3-year prelude with all-cause mortality between 2-6 months amongst those who survived 1-month following dialysis initiation.

|         | <b>Potassium variability quartiles (mEq/L)</b> |                                    |                                    |                            |
|---------|------------------------------------------------|------------------------------------|------------------------------------|----------------------------|
|         | <b>&lt;0.31<br/>(n=8,421)</b>                  | <b>0.31-&lt;0.41<br/>(n=8,757)</b> | <b>0.41-&lt;0.52<br/>(n=8,695)</b> | <b>≥0.52<br/>(n=8,294)</b> |
| Events  | 1,147 (14.1)                                   | 1,053 (12.4)                       | 1,047 (12.4)                       | 1,102 (13.7)               |
| Model 1 | Reference                                      | 0.86 (0.69-0.94)                   | 0.88 (0.81-0.96)                   | 0.98 (0.89-1.07)           |
| Model 2 | Reference                                      | 1.03 (0.94-1.13)                   | 1.15 (1.05-1.26)                   | 1.35 (1.23-1.48)           |
| Model 3 | Reference                                      | 1.03 (0.94-1.12)                   | 1.08 (0.98-1.18)                   | 1.17 (1.06-1.28)           |
| Model 4 | Reference                                      | 1.03 (0.94-1.13)                   | 1.04 (0.95-1.15)                   | 1.10 (0.99-1.22)           |
| Model 5 | Reference                                      | 1.06 (0.97-1.16)                   | 1.09 (0.99-1.20)                   | 1.14 (1.03-1.27)           |

Data are presented as number (percentage) or hazard ratio (95% CI) unless otherwise specified.

Models are as follows: model 1: adjusted for potassium intercept and slope over 3-year prelude; model 2: adjusted for variables in model 1 plus demographics (age, sex, race, marital status, smoking status); model 3: adjusted for variables in model 2 plus comorbidities (congestive heart failure, peripheral vascular disease, cerebrovascular disease, lung disease, peptic ulcer disease, paraplegia/hemiplegia, anemia, atrial fibrillation, hypertension, ischemic heart disease, diabetes, liver disease, malignancies), Charlson comorbidity index, cumulative length of hospitalizations, and BMI over the 3-year prelude period, and vascular access type; model 4: adjusted for variables in model 3 plus medications (RAASi, Na-polystyrene sulphonate, loop diuretics, potassium sparing diuretics, digoxin, beta blockers, calcium channel blockers, insulin, oral hypoglycemics, calcineurin inhibitors, trimethoprim, azole antifungals); model 5: adjusted for variables in model 4 plus average eGFR and number of potassium measurements over the 3-year prelude period.

BMI: body mass index; CI: confidence interval; eGFR: estimated glomerular filtration rate; RAASi: renal-angiotensin-aldosterone system inhibitors

**Table S6.** Univariable Cox regression assessing association between exposure/confounders (over 1-year prelude) and all-cause mortality within 6-months following dialysis initiation

| <b>Exposure/confounders</b>                     | <b>Reference</b> | <b>Hazard ratio (95% CI)</b> |
|-------------------------------------------------|------------------|------------------------------|
| K variability (0.30-<0.40)                      | <0.30            | 1.01 (0.91-1.12)             |
| K variability (0.40-<0.52)                      | <0.30            | 1.22 (1.10-1.35)*            |
| K variability ( $\geq$ 0.52)                    | <0.30            | 1.34 (1.21-1.48)*            |
| K intercept (unit=1 mEq/L)                      |                  | 0.84 (0.77-0.91)*            |
| K slope (unit=0.1 mEq/L/year)                   |                  | 1.00 (0.99-1.01)             |
| Age (unit=10 years)                             |                  | 1.64 (1.58-1.69)*            |
| Sex (Males)                                     | Female           | 1.54 (1.14-2.09)*            |
| Race (Black)                                    | White            | 0.59 (0.55-0.65)*            |
| Race (Other)                                    | White            | 0.57 (0.45-0.73)*            |
| Marital status (Unmarried)                      | Married          | 0.98 (0.91-1.05)             |
| Smoking status (Current)                        | Never            | 1.06 (0.97-1.16)             |
| Smoking status (Past)                           | Never            | 1.23 (1.13-1.35)*            |
| Congestive heart failure                        |                  | 1.82 (1.68-1.97)*            |
| Peripheral vascular disease                     |                  | 1.53 (1.42-1.64)*            |
| Cerebrovascular disease                         |                  | 1.51 (1.40-1.62)*            |
| Lung disease                                    |                  | 1.69 (1.57-1.82)*            |
| Peptic ulcer disease                            |                  | 1.42 (1.28-1.58)*            |
| Paraplegia/Hemiplegia                           |                  | 1.26 (1.10-1.45)*            |
| Anemia                                          |                  | 1.18 (1.06-1.30)*            |
| Atrial fibrillation                             |                  | 2.29 (2.14-2.47)*            |
| Hypertension                                    |                  | 0.43 (0.33-0.56)*            |
| Ischemic heart disease                          |                  | 1.68 (1.55-1.83)*            |
| Diabetes                                        |                  | 0.84 (0.77-0.91)*            |
| Malignancies                                    |                  | 1.69 (1.58-1.83)*            |
| Charlson comorbidity index (unit=1 comorbidity) |                  | 1.14 (1.13-1.15)*            |
| Body Mass Index (unit=5 kg/m <sup>2</sup> )     |                  | 0.80 (0.78-0.83)*            |
| Length of hospitalizations (unit=7 days)        |                  | 1.06 (1.05-1.06)*            |
| Vascular access (Catheter)                      | Other            | 2.87 (2.58-3.19)*            |
| RAASi                                           |                  | 0.98 (0.92-1.06)             |
| SPS                                             |                  | 1.06 (0.98-1.15)             |
| Loop diuretics                                  |                  | 0.97 (0.89-1.06)             |
| K sparing diuretics                             |                  | 1.86 (1.69-2.04)*            |
| Digoxin                                         |                  | 2.60 (2.33-2.92)*            |
| Beta blocker                                    |                  | 0.97 (0.89-1.07)             |
| Calcium channel blockers                        |                  | 0.46 (0.43-0.49)*            |
| Insulin                                         |                  | 0.83 (0.78-0.89)*            |
| Oral hypoglycemics                              |                  | 1.11 (1.03-1.20)*            |
| Calcineurin inhibitors                          |                  | 1.17 (0.90-1.51)             |
| Trimethoprim                                    |                  | 1.75 (1.45-2.12)*            |

|                                           |                   |
|-------------------------------------------|-------------------|
| Azole antifungals                         | 1.29 (1.18-1.41)* |
| eGFR (unit=5 ml/min/1.73 m <sup>2</sup> ) | 1.13 (1.12-1.14)* |
| K measurements (unit=5 measurements)      | 1.05 (1.04-1.06)* |

---

\* p < 0.05

K: potassium; eGFR: estimated glomerular filtration rate; RAASi: renal-angiotensin-aldosterone system inhibitors;  
SPS: sodium polystyrene sulphonate



**Table S7.** The association of K variability quartiles over the 1-year prelude with 6-month all-cause mortality following dialysis initiation.

|         | <b>Potassium variability quartiles (mEq/L)</b> |                                    |                                    |                            |
|---------|------------------------------------------------|------------------------------------|------------------------------------|----------------------------|
|         | <b>&lt;0.30<br/>(n=6,483)</b>                  | <b>0.30-&lt;0.40<br/>(n=6,265)</b> | <b>0.40-&lt;0.52<br/>(n=6,250)</b> | <b>≥0.52<br/>(n=6,154)</b> |
| Events  | 777 (11.9)                                     | 776 (12.4)                         | 910 (14.6)                         | 997 (16.2)                 |
| Model 1 | Reference                                      | 1.02 (0.92-1.14)                   | 1.26 (1.14-1.39)                   | 1.42 (1.28-1.57)           |
| Model 2 | Reference                                      | 1.11 (0.99-1.23)                   | 1.38 (1.25-1.53)                   | 1.59 (1.43-1.75)           |
| Model 3 | Reference                                      | 1.04 (0.93-1.16)                   | 1.17 (1.06-1.30)                   | 1.23 (1.11-1.37)           |
| Model 4 | Reference                                      | 1.02 (0.92-1.14)                   | 1.12 (1.01-1.24)                   | 1.14 (1.02-1.27)           |
| Model 5 | Reference                                      | 1.05 (0.94-1.17)                   | 1.15 (1.03-1.28)                   | 1.16 (1.04-1.29)           |

Data are presented as number (percentage) or hazard ratio (95% CI) unless otherwise specified.

Models are as follows: model 1: adjusted for potassium intercept and slope over 1-year prelude; model 2: adjusted for variables in model 1 plus demographics (age, sex, race, marital status, smoking status); model 3: adjusted for variables in model 2 plus comorbidities (congestive heart failure, peripheral vascular disease, cerebrovascular disease, lung disease, peptic ulcer disease, paraplegia/hemiplegia, anemia, atrial fibrillation, hypertension, ischemic heart disease, diabetes, liver disease, malignancies), Charlson comorbidity index, cumulative length of hospitalizations, and BMI over the 1-year prelude period, and vascular access type; model 4: adjusted for variables in model 3 plus medications (RAASi, Na-polystyrene sulphonate, loop diuretics, potassium sparing diuretics, digoxin, beta blockers, calcium channel blockers, insulin, oral hypoglycemics, calcineurin inhibitors, trimethoprim, azole antifungals); model 5: adjusted for variables in model 4 plus average eGFR and number of potassium measurements over the 1-year prelude period.

BMI: body mass index; CI: confidence interval; eGFR: estimated glomerular filtration rate; RAASi: renal-angiotensin-aldosterone system inhibitors

**Table S8.** The association of potassium variability quartiles over the 1-year prelude with 1-month all-cause mortality following dialysis initiation.

|         | <b>Potassium variability quartiles (mEq/L)</b> |                                          |                                          |                                  |
|---------|------------------------------------------------|------------------------------------------|------------------------------------------|----------------------------------|
|         | <b>&lt;0.30</b><br><b>(n=6,483)</b>            | <b>0.30-&lt;0.40</b><br><b>(n=6,265)</b> | <b>0.40-&lt;0.52</b><br><b>(n=6,250)</b> | <b>≥0.52</b><br><b>(n=6,154)</b> |
| Events  | 138 (2.1)                                      | 154 (2.5)                                | 160 (2.6)                                | 168 (2.7)                        |
| Model 1 | Reference                                      | 1.07 (0.83-1.38)                         | 1.13 (0.87-1.45)                         | 1.15 (0.89-1.49)                 |
| Model 2 | Reference                                      | 1.15 (0.89-1.49)                         | 1.23 (0.95-1.58)                         | 1.28 (0.99-1.66)                 |
| Model 3 | Reference                                      | 1.07 (0.82-1.38)                         | 1.02 (0.79-1.32)                         | 0.98 (0.75-1.27)                 |
| Model 4 | Reference                                      | 1.03 (0.79-1.34)                         | 0.95 (0.73-1.23)                         | 0.87 (0.66-1.15)                 |
| Model 5 | Reference                                      | 1.06 (0.82-1.37)                         | 0.97 (0.75-1.27)                         | 0.89 (0.67-1.18)                 |

Data are presented as number (percentage) or hazard ratio (95% CI) unless otherwise specified.

Models are as follows: model 1: adjusted for potassium intercept and slope over 1-year prelude; model 2: adjusted for variables in model 1 plus demographics (age, sex, race, marital status, smoking status); model 3: adjusted for variables in model 2 plus comorbidities (congestive heart failure, peripheral vascular disease, cerebrovascular disease, lung disease, peptic ulcer disease, paraplegia/hemiplegia, anemia, atrial fibrillation, hypertension, ischemic heart disease, diabetes, liver disease, malignancies), Charlson comorbidity index, cumulative length of hospitalizations, and BMI over the 1-year prelude period, and vascular access type; model 4: adjusted for variables in model 3 plus medications (RAASi, Na-polystyrene sulphonate, loop diuretics, potassium sparing diuretics, digoxin, beta blockers, calcium channel blockers, insulin, oral hypoglycemics, calcineurin inhibitors, trimethoprim, azole antifungals); model 5: adjusted for variables in model 4 plus average eGFR and number of potassium measurements over the 1-year prelude period.

BMI: body mass index; CI: confidence interval; eGFR: estimated glomerular filtration rate; RAASi: renal-angiotensin-aldosterone system inhibitors

**Table S9.** The association of potassium variability quartiles over the 1-year prelude with all-cause mortality between 2-6 months amongst those who survived within 1-month of dialysis initiation.

|         | <b>Potassium variability quartiles (mEq/L)</b> |                                    |                                    |                            |
|---------|------------------------------------------------|------------------------------------|------------------------------------|----------------------------|
|         | <b>&lt;0.30<br/>(n=6,483)</b>                  | <b>0.30-&lt;0.40<br/>(n=6,265)</b> | <b>0.40-&lt;0.52<br/>(n=6,250)</b> | <b>≥0.52<br/>(n=6,154)</b> |
| Events  | 639 (10.1)                                     | 622 (10.2)                         | 750 (12.3)                         | 829 (13.9)                 |
| Model 1 | Reference                                      | 1.01 (0.90-1.14)                   | 1.29 (1.15-1.44)                   | 1.49 (1.33-1.66)           |
| Model 2 | Reference                                      | 1.09 (0.98-1.24)                   | 1.42 (1.27-1.59)                   | 1.66 (1.48-1.85)           |
| Model 3 | Reference                                      | 1.03 (0.92-1.16)                   | 1.21 (1.08-1.35)                   | 1.29 (1.15-1.45)           |
| Model 4 | Reference                                      | 1.02 (0.90-1.15)                   | 1.16 (1.03-1.29)                   | 1.19 (1.06-1.35)           |
| Model 5 | Reference                                      | 1.04 (0.92-1.17)                   | 1.18 (1.05-1.33)                   | 1.21 (1.07-1.37)           |

Data are presented as number (percentage) or hazard ratio (95% CI) unless otherwise specified.

Models are as follows: model 1: adjusted for potassium intercept and slope over 1-year prelude; model 2: adjusted for variables in model 1 plus demographics (age, sex, race, marital status, smoking status); model 3: adjusted for variables in model 2 plus comorbidities (congestive heart failure, peripheral vascular disease, cerebrovascular disease, lung disease, peptic ulcer disease, paraplegia/hemiplegia, anemia, atrial fibrillation, hypertension, ischemic heart disease, diabetes, liver disease, malignancies), Charlson comorbidity index, cumulative length of hospitalizations, and BMI over the 1-year prelude period, and vascular access type; model 4: adjusted for variables in model 3 plus medications (RAASi, Na-polystyrene sulphonate, loop diuretics, potassium sparing diuretics, digoxin, beta blockers, calcium channel blockers, insulin, oral hypoglycemics, calcineurin inhibitors, trimethoprim,azole antifungals); model 5: adjusted for variables in model 4 plus average eGFR and number of potassium measurements over the 1-year prelude period.

BMI: body mass index; CI: confidence interval; eGFR: estimated glomerular filtration rate; RAASi: renal-angiotensin-aldosterone system inhibitors

**Table S10.** Adjusted hazard ratios (95% CI) of 6-month all-cause mortality following dialysis initiation with prelude potassium variability quartiles over the 1-year prelude in selected subgroups.

| Subgroup                                         | Potassium variability quartiles (mEq/L) |                         |                         |                    | p-value          |      |
|--------------------------------------------------|-----------------------------------------|-------------------------|-------------------------|--------------------|------------------|------|
|                                                  | <0.30<br>(n=6,483)                      | 0.30-<0.40<br>(n=6,265) | 0.40-<0.52<br>(n=6,250) | ≥0.52<br>(n=6,154) |                  |      |
| Events                                           | 777 (11.9)                              | 776 (12.4)              | 910 (14.6)              | 997 (16.2)         |                  |      |
| Age < 65 years                                   | Model 5                                 | Reference               | 1.31 (1.01-1.70)        | 1.52 (1.18-1.95)   | 1.38 (1.06-1.79) | 0.01 |
| Age ≥ 65 years                                   | Model 5                                 | Reference               | 0.97 (0.86-1.09)        | 1.04 (0.92-1.17)   | 1.08 (0.95-1.22) |      |
| Race: White                                      | Model 5                                 | Reference               | 1.09 (0.96-1.24)        | 1.18 (1.04-1.33)   | 1.16 (1.02-1.32) |      |
| Race: African American                           | Model 5                                 | Reference               | 0.95 (0.75-1.19)        | 1.09 (0.87-1.36)   | 1.12 (0.89-1.42) | 0.63 |
| Diabetes                                         | Model 5                                 | Reference               | 1.04 (0.92-1.18)        | 1.15 (1.02-1.29)   | 1.14 (1.00-1.29) |      |
| No Diabetes                                      | Model 5                                 | Reference               | 1.04 (0.83-1.29)        | 1.09 (0.88-1.37)   | 1.19 (0.94-1.50) | 0.84 |
| Congestive heart failure                         | Model 5                                 | Reference               | 1.05 (0.93-1.19)        | 1.13 (0.99-1.28)   | 1.14 (1.00-1.29) |      |
| No Congestive heart failure                      | Model 5                                 | Reference               | 0.99 (0.80-1.22)        | 1.15 (0.93-1.42)   | 1.13 (0.91-1.42) | 0.82 |
| RAASi                                            | Model 5                                 | Reference               | 1.07 (0.93-1.23)        | 1.13 (0.98-1.29)   | 1.17 (1.01-1.35) | 0.81 |
| No RAASi                                         | Model 5                                 | Reference               | 1.03 (0.87-1.22)        | 1.18 (1.00-1.39)   | 1.13 (0.94-1.35) |      |
| SPS                                              | Model 5                                 | Reference               | 1.03 (0.69-1.54)        | 1.20 (0.84-1.73)   | 1.23 (0.86-1.75) | 0.80 |
| No SPS                                           | Model 5                                 | Reference               | 1.06 (0.94-1.18)        | 1.14 (1.01-1.28)   | 1.13 (0.99-1.28) |      |
| eGFR < 15 ml/min <sup>2</sup> /1.73 <sup>2</sup> | Model 5                                 | Reference               | 1.01 (0.83-1.22)        | 1.11 (0.91-1.35)   | 1.06 (0.86-1.31) |      |
| eGFR ≥ 15 ml/min <sup>2</sup> /1.73 <sup>2</sup> | Model 5                                 | Reference               | 1.05 (0.92-1.19)        | 1.13 (0.99-1.28)   | 1.15 (1.01-1.32) | 0.95 |
| K measurements ≤ 11                              | Model 5                                 | Reference               | 1.03 (0.89-1.18)        | 1.21 (1.05-1.39)   | 1.05 (0.89-1.22) |      |
| K measurements > 11                              | Model 5                                 | Reference               | 1.04 (0.85-1.27)        | 1.08 (0.89-1.31)   | 1.17 (0.96-1.43) | 0.10 |

Data are presented as hazard ratio (95% CI) unless otherwise specified.

Model adjusted for potassium intercept and slope over 1-year prelude, demographics (age, sex, race, marital status, smoking status), comorbidities (congestive heart failure, peripheral vascular disease, cerebrovascular disease, lung disease, peptic ulcer disease, paraplegia/hemiplegia, anemia, atrial fibrillation, hypertension, ischemic heart disease, diabetes, liver disease, malignancies), Charlson comorbidity index, cumulative length of hospitalizations, BMI over the 1-year prelude period, vascular access type, medications (RAASi, Na-polystyrene sulphonate, loop diuretics, potassium sparing diuretics, digoxin, beta blockers, calcium channel blockers, insulin, oral hypoglycemics, calcineurin inhibitors, trimethoprim, azole antifungals), average eGFR and number of potassium measurements over the 1-year prelude period.

BMI: body mass index; CHF: congestive heart failure; DM: diabetes mellitus; eGFR: estimated glomerular filtration rate; K: potassium; SPS; Na-polystyrene sulphonate; RAASi: renal-angiotensin-aldosterone system inhibitors

**Table S11.** Univariable Cox regression assessing association between exposure/confounders (over 3-year prelude) and cardiovascular mortality within 6-months following dialysis initiation

| <b>Exposure/confounders</b>                     | <b>Reference</b> | <b>Subhazard ratio<br/>(95% CI)</b> |
|-------------------------------------------------|------------------|-------------------------------------|
| K variability (0.31-<0.41)                      | <0.31            | 0.90 (0.79-1.03)                    |
| K variability (0.41-<0.52)                      | <0.31            | 0.84 (0.73-0.95)*                   |
| K variability ( $\geq$ 0.52)                    | <0.31            | 0.88 (0.77-1.00)                    |
| K intercept (unit=1 mEq/L)                      |                  | 1.06 (0.96-1.18)                    |
| K slope (unit=0.1 mEq/L/year)                   |                  | 0.96 (0.93-0.99)*                   |
| Age (unit=10 years)                             |                  | 1.64 (1.57-1.72)*                   |
| Sex (Males)                                     | Female           | 2.14 (1.31-3.51)*                   |
| Race (Black)                                    | White            | 0.52 (0.46-0.59)*                   |
| Race (Other)                                    | White            | 0.62 (0.45-0.86)*                   |
| Marital status (Unmarried)                      | Married          | 0.87 (0.79-0.96)*                   |
| Smoking status (Current)                        | Never            | 0.94 (0.84-1.06)                    |
| Smoking status (Past)                           | Never            | 1.19 (1.07-1.35)*                   |
| Congestive heart failure                        |                  | 2.67 (2.36-3.02)*                   |
| Peripheral vascular disease                     |                  | 1.92 (1.74-2.12)*                   |
| Cerebrovascular disease                         |                  | 1.76 (1.60-1.93)*                   |
| Lung disease                                    |                  | 1.91 (1.72-2.11)*                   |
| Peptic ulcer disease                            |                  | 1.33 (1.16-1.52)*                   |
| Paraplegia/Hemiplegia                           |                  | 1.24 (1.04-1.48)*                   |
| Anemia                                          |                  | 1.36 (1.18-1.57)*                   |
| Atrial fibrillation                             |                  | 2.41 (2.19-2.65)*                   |
| Hypertension                                    |                  | 0.87 (0.54-1.41)                    |
| Ischemic heart disease                          |                  | 2.49 (2.20-2.83)*                   |
| Diabetes                                        |                  | 1.10 (0.98-1.24)                    |
| Malignancies                                    |                  | 1.32 (1.19-1.45)*                   |
| Charlson comorbidity index (unit=1 comorbidity) |                  | 1.13 (1.11-1.14)*                   |
| Body Mass Index (unit=5 kg/m <sup>2</sup> )     |                  | 0.86 (0.82-0.89)*                   |
| Length of hospitalizations (unit=7 days)        |                  | 1.02 (1.02-1.03)*                   |
| Vascular access (Catheter)                      | Other            | 2.78 (2.39-3.23)*                   |
| RAASi                                           |                  | 1.01 (0.90-1.14)                    |
| SPS                                             |                  | 0.86 (0.77-0.96)*                   |
| Loop diuretics                                  |                  | 1.07 (0.95-1.21)                    |
| K sparing diuretics                             |                  | 1.42 (1.26-1.59)*                   |
| Digoxin                                         |                  | 2.78 (2.46-3.15)*                   |
| Beta blocker                                    |                  | 1.08 (0.95-1.22)                    |
| Calcium channel blockers                        |                  | 0.48 (0.44-0.53)*                   |
| Insulin                                         |                  | 0.85 (0.78-0.94)*                   |
| Oral hypoglycemics                              |                  | 0.95 (0.87-1.05)                    |
| Calcineurin inhibitors                          |                  | 0.87 (0.60-1.24)                    |
| Trimethoprim                                    |                  | 1.60 (1.36-1.89)*                   |

|                                           |                   |
|-------------------------------------------|-------------------|
| Azole antifungals                         | 0.93 (0.84-1.04)  |
| eGFR (unit=5 ml/min/1.73 m <sup>2</sup> ) | 1.07 (1.06-1.08)* |
| K measurements (unit=5 measurements)      | 1.00 (0.99-1.01)  |

---

\* p < 0.05

K: potassium; eGFR: estimated glomerular filtration rate; RAASi: renal-angiotensin-aldosterone system inhibitors;  
SPS: sodium polystyrene sulphonate

**Table S12.** The association of potassium variability quartiles over the 3-year prelude with 6-month cardiovascular mortality following dialysis initiation.

|         | <b>Potassium variability quartiles (mEq/L)</b> |                                    |                                    |                            |
|---------|------------------------------------------------|------------------------------------|------------------------------------|----------------------------|
|         | <b>&lt;0.31<br/>(n=8,421)</b>                  | <b>0.31-&lt;0.41<br/>(n=8,757)</b> | <b>0.41-&lt;0.52<br/>(n=8,695)</b> | <b>≥0.52<br/>(n=8,294)</b> |
| Events  | 521 (6.2)                                      | 484 (5.5)                          | 457 (5.3)                          | 453 (5.5)                  |
| Model 1 | Reference                                      | 0.90 (0.79-1.03)                   | 0.83 (0.73-0.95)                   | 0.87 (0.76-0.99)           |
| Model 2 | Reference                                      | 1.08 (0.95-1.23)                   | 1.09 (0.95-1.24)                   | 1.21 (1.05-1.38)           |
| Model 3 | Reference                                      | 1.06 (0.93-1.21)                   | 0.99 (0.87-1.14)                   | 1.02 (0.89-1.17)           |
| Model 4 | Reference                                      | 1.05 (0.92-1.20)                   | 0.96 (0.84-1.11)                   | 0.97 (0.84-1.13)           |
| Model 5 | Reference                                      | 1.08 (0.94-1.23)                   | 0.99 (0.86-1.14)                   | 0.99 (0.85-1.16)           |

Data are presented as number (percentage) or subhazard ratio (95% CI) unless otherwise specified.

Models are as follows: model 1: adjusted for potassium intercept and slope over 3-year prelude; model 2: adjusted for variables in model 1 plus demographics (age, sex, race, marital status, smoking status); model 3: adjusted for variables in model 2 plus comorbidities (congestive heart failure, peripheral vascular disease, cerebrovascular disease, lung disease, peptic ulcer disease, paraplegia/hemiplegia, anemia, atrial fibrillation, hypertension, ischemic heart disease, diabetes, liver disease, malignancies), Charlson comorbidity index, cumulative length of hospitalizations, and BMI over the 3-year prelude period, and vascular access type; model 4: adjusted for variables in model 3 plus medications (RAASi, Na-polystyrene sulphonate, loop diuretics, potassium sparing diuretics, digoxin, beta blockers, calcium channel blockers, insulin, oral hypoglycemics, calcineurin inhibitors, trimethoprim, azole antifungals); model 5: adjusted for variables in model 4 plus average eGFR and number of potassium  
 BMI: body mass index; CI: confidence interval; eGFR: estimated glomerular filtration rate; RAASi: renal-angiotensin-aldosterone system inhibitors

**Table S13.** Adjusted subhazard ratios (95% CI) of 6-month cardiovascular mortality following dialysis initiation with potassium variability quartiles over the 3-year prelude in selected subgroups.

| Subgroup                                         | Potassium variability quartiles (mEq/L) |                         |                         |                    | p-value          |      |
|--------------------------------------------------|-----------------------------------------|-------------------------|-------------------------|--------------------|------------------|------|
|                                                  | <0.31<br>(n=8,421)                      | 0.31-<0.41<br>(n=8,757) | 0.41-<0.52<br>(n=8,695) | ≥0.52<br>(n=8,294) |                  |      |
| Events                                           | 521 (6.2)                               | 484 (5.5)               | 457 (5.3)               | 453 (5.5)          |                  |      |
| Age < 65 years                                   | Model 5                                 | Reference               | 1.24 (0.87-1.77)        | 1.26 (0.89-1.79)   | 1.34 (0.92-1.94) |      |
| Age ≥ 65 years                                   | Model 5                                 | Reference               | 1.03 (0.89-1.19)        | 0.93 (0.79-1.09)   | 0.89 (0.75-1.06) | 0.16 |
| Race: White                                      | Model 5                                 | Reference               | 1.11 (0.96-1.29)        | 1.00 (0.85-1.17)   | 0.98 (0.82-1.16) |      |
| Race: African American                           | Model 5                                 | Reference               | 0.96 (0.67-1.36)        | 0.97 (0.68-1.39)   | 0.98 (0.66-1.45) | 0.58 |
| Diabetes                                         | Model 5                                 | Reference               | 1.15 (0.99-1.34)        | 0.99 (0.85-1.17)   | 1.01 (0.85-1.21) |      |
| No Diabetes                                      | Model 5                                 | Reference               | 0.82 (0.61-1.12)        | 0.96 (0.70-1.29)   | 0.94 (0.67-1.30) | 0.24 |
| Congestive heart failure                         | Model 5                                 | Reference               | 1.12 (0.97-1.30)        | 1.07 (0.92-1.25)   | 1.04 (0.87-1.23) |      |
| No Congestive heart failure                      | Model 5                                 | Reference               | 0.89 (0.65-1.21)        | 0.67 (0.47-0.95)   | 0.79 (0.54-1.17) | 0.12 |
| RAASi                                            | Model 5                                 | Reference               | 1.09 (0.93-1.28)        | 1.02 (0.87-1.21)   | 1.05 (0.88-1.25) |      |
| No RAASi                                         | Model 5                                 | Reference               | 1.03 (0.78-1.34)        | 0.87 (0.64-1.18)   | 0.82 (0.58-1.15) | 0.62 |
| SPS                                              | Model 5                                 | Reference               | 0.86 (0.54-1.37)        | 0.71 (0.46-1.10)   | 0.73 (0.47-1.12) |      |
| No SPS                                           | Model 5                                 | Reference               | 1.08 (0.94-1.24)        | 1.02 (0.87-1.19)   | 1.02 (0.86-1.22) | 0.35 |
| eGFR < 15 ml/min <sup>2</sup> /1.73 <sup>2</sup> | Model 5                                 | Reference               | 0.93 (0.57-1.51)        | 0.87 (0.51-1.47)   | 0.79 (0.45-1.38) |      |
| eGFR ≥ 15 ml/min <sup>2</sup> /1.73 <sup>2</sup> | Model 5                                 | Reference               | 1.08 (0.94-1.24)        | 0.97 (0.84-1.13)   | 0.98 (0.83-1.15) | 0.92 |
| K measurements ≤ 19                              | Model 5                                 | Reference               | 1.12 (0.96-1.31)        | 0.99 (0.82-1.18)   | 1.04 (0.86-1.26) |      |
| K measurements > 19                              | Model 5                                 | Reference               | 0.96 (0.69-1.32)        | 0.93 (0.68-1.29)   | 0.92 (0.66-1.29) | 0.80 |

Data are presented as subhazard ratio (95% CI) unless otherwise specified.

Model adjusted for potassium intercept and slope over 3-year prelude, demographics (age, sex, race, marital status, smoking status), comorbidities (congestive heart failure, peripheral vascular disease, cerebrovascular disease, lung disease, peptic ulcer disease, paraplegia/hemiplegia, anemia, atrial fibrillation, hypertension, ischemic heart disease, diabetes, liver disease, malignancies), Charlson comorbidity index, cumulative length of hospitalizations, BMI over the 3-year prelude period, vascular access type, medications (RAASi, Na-polystyrene sulphonate, loop diuretics, potassium sparing diuretics, digoxin, beta blockers, calcium channel blockers, insulin, oral hypoglycemics, calcineurin inhibitors, trimethoprim,azole antifungals), average eGFR and number of potassium measurements over the 3-year prelude period.

BMI: body mass index; CI: confidence interval; CHF: congestive heart failure; DM: diabetes mellitus; eGFR: estimated glomerular filtration rate; K: potassium; SPS: Na-polystyrene sulphonate; RAASi: renal-angiotensin-aldosterone system inhibitors



**Table S14.** The association of potassium variability quartiles over the 3-year prelude with 1-month cardiovascular mortality following dialysis initiation.

|         | <b>Potassium variability quartiles (mEq/L)</b> |                                    |                                    |                            |
|---------|------------------------------------------------|------------------------------------|------------------------------------|----------------------------|
|         | <b>&lt;0.31<br/>(n=8,421)</b>                  | <b>0.31-&lt;0.41<br/>(n=8,757)</b> | <b>0.41-&lt;0.52<br/>(n=8,695)</b> | <b>≥0.52<br/>(n=8,294)</b> |
| Events  | 107 (1.3)                                      | 110 (1.3)                          | 91 (1.1)                           | 99 (1.2)                   |
| Model 1 | Reference                                      | 1.01 (0.76-1.35)                   | 0.86 (0.64-1.17)                   | 0.92 (0.68-1.25)           |
| Model 2 | Reference                                      | 1.21 (0.91-1.62)                   | 1.13 (0.84-1.53)                   | 1.29 (0.95-1.74)           |
| Model 3 | Reference                                      | 1.19 (0.89-1.59)                   | 1.07 (0.79-1.45)                   | 1.13 (0.83-1.54)           |
| Model 4 | Reference                                      | 1.21 (0.89-1.62)                   | 1.08 (0.78-1.49)                   | 1.18 (0.84-1.66)           |
| Model 5 | Reference                                      | 1.22 (0.91-1.65)                   | 1.09 (0.79-1.51)                   | 1.19 (0.85-1.69)           |

Data are presented as number (percentage) or subhazard ratio (95% CI) unless otherwise specified.

Models are as follows: model 1: adjusted for potassium intercept and slope over 3-year prelude; model 2: adjusted for variables in model 1 plus demographics (age, sex, race, marital status, smoking status); model 3: adjusted for variables in model 2 plus comorbidities (congestive heart failure, peripheral vascular disease, cerebrovascular disease, lung disease, peptic ulcer disease, paraplegia/hemiplegia, anemia, atrial fibrillation, hypertension, ischemic heart disease, diabetes, liver disease, malignancies), Charlson comorbidity index, cumulative length of hospitalizations, and BMI over the 3-year prelude period, and vascular access type; model 4: adjusted for variables in model 3 plus medications (RAASi, Na-polystyrene sulphonate, loop diuretics, potassium sparing diuretics, digoxin, beta blockers, calcium channel blockers, insulin, oral hypoglycemics, calcineurin inhibitors, trimethoprim, azole antifungals); model 5: adjusted for variables in model 4 plus average eGFR and number of potassium measurements over the 3-year prelude period.

BMI: body mass index; CI: confidence interval; eGFR: estimated glomerular filtration rate; RAASi: renal-angiotensin-aldosterone system inhibitors

**Table S15.** The association of potassium variability quartiles over the 3-year prelude with cardiovascular between 2-6 months amongst those who survived within 1-month of dialysis initiation.

|         | <b>Potassium variability quartiles (mEq/L)</b> |                                    |                                    |                            |
|---------|------------------------------------------------|------------------------------------|------------------------------------|----------------------------|
|         | <b>&lt;0.31<br/>(n=8,421)</b>                  | <b>0.31-&lt;0.41<br/>(n=8,757)</b> | <b>0.41-&lt;0.52<br/>(n=8,695)</b> | <b>≥0.52<br/>(n=8,294)</b> |
| Events  | 414 (5.1)                                      | 374 (4.4)                          | 366 (4.3)                          | 354 (4.4)                  |
| Model 1 | Reference                                      | 0.89 (0.76-1.03)                   | 0.83 (0.71-0.97)                   | 0.87 (0.74-1.01)           |
| Model 2 | Reference                                      | 1.06 (0.92-1.23)                   | 1.09 (0.93-1.27)                   | 1.19 (1.03-1.39)           |
| Model 3 | Reference                                      | 1.04 (0.89-1.20)                   | 0.99 (0.85-1.16)                   | 1.00 (0.86-1.17)           |
| Model 4 | Reference                                      | 1.02 (0.88-1.19)                   | 0.94 (0.79-1.09)                   | 0.92 (0.77-1.09)           |
| Model 5 | Reference                                      | 1.04 (0.89-1.21)                   | 0.96 (0.82-1.13)                   | 0.94 (0.79-1.12)           |

Data are presented as number (percentage) or subhazard ratio (95% CI) unless otherwise specified.

Models are as follows: model 1: adjusted for potassium intercept and slope over 3-year prelude; model 2: adjusted for variables in model 1 plus demographics (age, sex, race, marital status, smoking status); model 3: adjusted for variables in model 2 plus comorbidities (congestive heart failure, peripheral vascular disease, cerebrovascular disease, lung disease, peptic ulcer disease, paraplegia/hemiplegia, anemia, atrial fibrillation, hypertension, ischemic heart disease, diabetes, liver disease, malignancies), Charlson comorbidity index, cumulative length of hospitalizations, and BMI over the 3-year prelude period, and vascular access type; model 4: adjusted for variables in model 3 plus medications (RAASi, Na-polystyrene sulphonate, loop diuretics, potassium sparing diuretics, digoxin, beta blockers, calcium channel blockers, insulin, oral hypoglycemics, calcineurin inhibitors, trimethoprim,azole antifungals); model 5: adjusted for variables in model 4 plus average eGFR and number of potassium measurements over the 3-year prelude period.

BMI: body mass index; CI: confidence interval; eGFR: estimated glomerular filtration rate; RAASi: renal-angiotensin-aldosterone system inhibitors

**Table S16.** Univariable Cox regression assessing association between exposure/confounders (over 1-year prelude) and cardiovascular mortality within 6-months following dialysis initiation

| <b>Exposure/confounders</b>                     | <b>Reference</b> | <b>Subhazard ratio<br/>(95% CI)</b> |
|-------------------------------------------------|------------------|-------------------------------------|
| K variability (0.30-<0.40)                      | <0.30            | 1.08 (0.91-1.29)                    |
| K variability (0.40-<0.52)                      | <0.30            | 1.28 (1.08-1.52)*                   |
| K variability ( $\geq$ 0.52)                    | <0.30            | 1.30 (1.10-1.54)*                   |
| K intercept (unit=1 mEq/L)                      |                  | 0.90 (0.79-1.03)                    |
| K slope (unit=0.1 mEq/L/year)                   |                  | 0.99 (0.97-1.00)                    |
| Age (unit=10 years)                             |                  | 1.67 (1.57-1.77)*                   |
| Sex (Males)                                     | Female           | 1.70 (1.00-2.88)*                   |
| Race (Black)                                    | White            | 0.59 (0.51-0.68)*                   |
| Race (Other)                                    | White            | 0.67 (0.46-0.98)*                   |
| Marital status (Unmarried)                      | Married          | 0.89 (0.79-0.99)*                   |
| Smoking status (Current)                        | Never            | 0.94 (0.81-1.09)                    |
| Smoking status (Past)                           | Never            | 1.15 (0.99-1.33)                    |
| Congestive heart failure                        |                  | 2.52 (2.17-2.92)*                   |
| Peripheral vascular disease                     |                  | 1.89 (1.67-2.13)*                   |
| Cerebrovascular disease                         |                  | 1.68 (1.49-1.89)*                   |
| Lung disease                                    |                  | 1.86 (1.64-2.11)*                   |
| Peptic ulcer disease                            |                  | 1.36 (1.14-1.62)*                   |
| Paraplegia/Hemiplegia                           |                  | 1.28 (1.02-1.61)*                   |
| Anemia                                          |                  | 1.27 (1.07-1.52)*                   |
| Atrial fibrillation                             |                  | 2.56 (2.27-2.88)*                   |
| Hypertension                                    |                  | 0.68 (0.39-1.17)                    |
| Ischemic heart disease                          |                  | 2.32 (2.01-2.69)*                   |
| Diabetes                                        |                  | 1.13 (0.97-1.31)                    |
| Malignancies                                    |                  | 1.26 (1.12-1.43)*                   |
| Charlson comorbidity index (unit=1 comorbidity) |                  | 1.13 (1.11-1.15)*                   |
| BMI (unit=5 kg/m <sup>2</sup> )                 |                  | 0.83 (0.79-0.88)*                   |
| Length of hospitalizations (unit=7 days)        |                  | 1.06 (1.05-1.07)*                   |
| Vascular access (Catheter)                      | Catheter         | 2.61 (2.19-3.12)*                   |
| RAASi                                           |                  | 0.99 (0.88-1.12)                    |
| SPS                                             |                  | 1.01 (0.88-1.15)                    |
| Loop diuretics                                  |                  | 1.12 (0.96-1.32)                    |
| K sparing diuretics                             |                  | 1.87 (1.60-2.17)*                   |
| Digoxin                                         |                  | 2.91 (2.44-3.47)*                   |
| Beta blocker                                    |                  | 1.06 (0.91-1.24)                    |
| Calcium channel blockers                        |                  | 0.46 (0.41-0.52)*                   |
| Insulin                                         |                  | 0.92 (0.82-1.04)                    |
| Oral hypoglycemics                              |                  | 1.11 (0.98-1.27)                    |
| Calcineurin inhibitors                          |                  | 0.92 (0.57-1.49)                    |
| Trimethoprim                                    |                  | 1.83 (1.35-2.47)*                   |

|                                           |                   |
|-------------------------------------------|-------------------|
| Azole antifungals                         | 1.22 (1.05-1.42)* |
| eGFR (unit=5 ml/min/1.73 m <sup>2</sup> ) | 1.10 (1.09-1.12)* |
| K measurements (unit=5 measurements)      | 1.04 (1.03-1.06)* |

---

\* p < 0.05

K: potassium; eGFR: estimated glomerular filtration rate; RAASi: renal-angiotensin-aldosterone system inhibitors;  
SPS: sodium polystyrene sulphonate

**Table S17.** The association of potassium variability quartiles over the 1-year prelude with 6-month cardiovascular mortality following dialysis initiation.

|         | <b>Potassium variability quartiles (mEq/L)</b> |                                          |                                          |                                  |
|---------|------------------------------------------------|------------------------------------------|------------------------------------------|----------------------------------|
|         | <b>&lt;0.30</b><br><b>(n=6,483)</b>            | <b>0.30-&lt;0.40</b><br><b>(n=6,265)</b> | <b>0.40-&lt;0.52</b><br><b>(n=6,250)</b> | <b>≥0.52</b><br><b>(n=6,154)</b> |
| Events  | 262 (4.0)                                      | 276 (4.4)                                | 325 (5.2)                                | 329 (5.4)                        |
| Model 1 | Reference                                      | 1.09 (0.92-1.30)                         | 1.31 (1.11-1.56)                         | 1.36 (1.14-1.62)                 |
| Model 2 | Reference                                      | 1.19 (0.99-1.42)                         | 1.46 (1.23-1.72)                         | 1.54 (1.29-1.83)                 |
| Model 3 | Reference                                      | 1.11 (0.93-1.33)                         | 1.24 (1.04-1.47)                         | 1.19 (1.00-1.43)                 |
| Model 4 | Reference                                      | 1.11 (0.93-1.32)                         | 1.21 (1.01-1.44)                         | 1.15 (0.96-1.39)                 |
| Model 5 | Reference                                      | 1.13 (0.95-1.36)                         | 1.24 (1.03-1.48)                         | 1.18 (0.98-1.42)                 |

Data are presented as number (percentage) or subhazard ratio (95% CI) unless otherwise specified.

Models are as follows: model 1: adjusted for potassium intercept and slope over 1-year prelude; model 2: adjusted for variables in model 1 plus demographics (age, sex, race, marital status, smoking status); model 3: adjusted for variables in model 2 plus comorbidities (congestive heart failure, peripheral vascular disease, cerebrovascular disease, lung disease, peptic ulcer disease, paraplegia/hemiplegia, anemia, atrial fibrillation, hypertension, ischemic heart disease, diabetes, liver disease, malignancies), Charlson comorbidity index, cumulative length of hospitalizations, and BMI over the 1-year prelude period, and vascular access type; model 4: adjusted for variables in model 3 plus medications (RAASi, Na-polystyrene sulphonate, loop diuretics, potassium sparing diuretics, digoxin, beta blockers, calcium channel blockers, insulin, oral hypoglycemics, calcineurin inhibitors, trimethoprim, azole antifungals); model 5: adjusted for variables in model 4 plus average eGFR and number of potassium measurements over the 1-year prelude period.

BMI: body mass index; CI: confidence interval; eGFR: estimated glomerular filtration rate; RAASi: renal-angiotensin-aldosterone system inhibitors

**Table S18.** The association of potassium variability quartiles over the 3-year prelude with all-cause mortality between 2-6 months amongst those who survived 1-month following dialysis initiation.

|         | <b>Potassium variability quartiles (mEq/L)</b> |                                    |                                    |                            |
|---------|------------------------------------------------|------------------------------------|------------------------------------|----------------------------|
|         | <b>&lt;0.30<br/>(n=6,483)</b>                  | <b>0.30-&lt;0.40<br/>(n=6,265)</b> | <b>0.40-&lt;0.52<br/>(n=6,250)</b> | <b>≥0.52<br/>(n=6,154)</b> |
| Events  | 205 (3.2)                                      | 216 (3.5)                          | 263 (4.3)                          | 266 (4.4)                  |
| Model 1 | Reference                                      | 1.11 (0.91-1.35)                   | 1.41 (1.16-1.71)                   | 1.44 (1.19-1.76)           |
| Model 2 | Reference                                      | 1.21 (0.99-1.48)                   | 1.57 (1.29-1.89)                   | 1.64 (1.35-1.99)           |
| Model 3 | Reference                                      | 1.14 (0.93-1.39)                   | 1.35 (1.11-1.64)                   | 1.29 (1.05-1.57)           |
| Model 4 | Reference                                      | 1.14 (0.93-1.39)                   | 1.31 (1.07-1.59)                   | 1.24 (1.00-1.52)           |
| Model 5 | Reference                                      | 1.16 (0.94-1.42)                   | 1.33 (1.09-1.63)                   | 1.25 (1.02-1.54)           |

Data are presented as number (percentage) or subhazard ratio (95% CI) unless otherwise specified.

Models are as follows: model 1: adjusted for potassium intercept and slope over 1-year prelude; model 2: adjusted for variables in model 1 plus demographics (age, sex, race, marital status, smoking status); model 3: adjusted for variables in model 2 plus comorbidities (congestive heart failure, peripheral vascular disease, cerebrovascular disease, lung disease, peptic ulcer disease, paraplegia/hemiplegia, anemia, atrial fibrillation, hypertension, ischemic heart disease, diabetes, liver disease, malignancies), Charlson comorbidity index, cumulative length of hospitalizations, and BMI over the 1-year prelude period, and vascular access type; model 4: adjusted for variables in model 3 plus medications (RAASi, Na-polystyrene sulphonate, loop diuretics, potassium sparing diuretics, digoxin, beta blockers, calcium channel blockers, insulin, oral hypoglycemics, calcineurin inhibitors, trimethoprim, azole antifungals); model 5: adjusted for variables in model 4 plus average eGFR and number of potassium measurements over the 1-year prelude period.

BMI: body mass index; CI: confidence interval; eGFR: estimated glomerular filtration rate; RAASi: renal-angiotensin-aldosterone system inhibitors

**Table S19.** The association of potassium variability quartiles over the 1-year prelude with 1-month cardiovascular mortality following dialysis initiation.

|         | <b>Potassium variability quartiles (mEq/L)</b> |                                          |                                          |                                  |
|---------|------------------------------------------------|------------------------------------------|------------------------------------------|----------------------------------|
|         | <b>&lt;0.30</b><br><b>(n=6,483)</b>            | <b>0.30-&lt;0.40</b><br><b>(n=6,265)</b> | <b>0.40-&lt;0.52</b><br><b>(n=6,250)</b> | <b>≥0.52</b><br><b>(n=6,154)</b> |
| Events  | 57 (0.9)                                       | 60 (0.9)                                 | 62 (0.9)                                 | 63 (1.0)                         |
| Model 1 | Reference                                      | 1.07 (0.73-1.56)                         | 1.04 (0.70-1.54)                         | 1.15 (0.78-1.70)                 |
| Model 2 | Reference                                      | 1.16 (0.79-1.69)                         | 1.16 (0.79-1.69)                         | 1.31 (0.89-1.92)                 |
| Model 3 | Reference                                      | 1.05 (0.72-1.53)                         | 0.94 (0.64-1.38)                         | 0.97 (0.65-1.43)                 |
| Model 4 | Reference                                      | 1.04 (0.71-1.52)                         | 0.91 (0.61-1.35)                         | 0.92 (0.61-1.39)                 |
| Model 5 | Reference                                      | 1.06 (0.72-1.55)                         | 0.93 (0.62-1.39)                         | 0.94 (0.62-1.43)                 |

Data are presented as number (percentage) or subhazard ratio (95% CI) unless otherwise specified.

Models are as follows: model 1: adjusted for potassium intercept and slope over 1-year prelude; model 2: adjusted for variables in model 1 plus demographics (age, sex, race, marital status, smoking status); model 3: adjusted for variables in model 2 plus comorbidities (congestive heart failure, peripheral vascular disease, cerebrovascular disease, lung disease, peptic ulcer disease, paraplegia/hemiplegia, anemia, atrial fibrillation, hypertension, ischemic heart disease, diabetes, liver disease, malignancies), Charlson comorbidity index, cumulative length of hospitalizations, and BMI over the 1-year prelude period, and vascular access type; model 4: adjusted for variables in model 3 plus medications (RAASi, Na-polystyrene sulphonate, loop diuretics, potassium sparing diuretics, digoxin, beta blockers, calcium channel blockers, insulin, oral hypoglycemics, calcineurin inhibitors, trimethoprim, azole antifungals); model 5: adjusted for variables in model 4 plus average eGFR and number of potassium measurements over the 1-year prelude period.

BMI: body mass index; CI: confidence interval; eGFR: estimated glomerular filtration rate; RAASi: renal-angiotensin-aldosterone system inhibitors

**Table S20.** Adjusted subhazard ratios (95% CI) of 6-month cardiovascular mortality following dialysis initiation with prelude potassium variability quartiles over the 1-year prelude in selected subgroups

| Subgroup                                         | Potassium variability quartiles (mEq/L) |                         |                         |                    | p-value          |       |
|--------------------------------------------------|-----------------------------------------|-------------------------|-------------------------|--------------------|------------------|-------|
|                                                  | <0.30<br>(n=6,483)                      | 0.30-<0.40<br>(n=6,265) | 0.40-<0.52<br>(n=6,250) | ≥0.52<br>(n=6,154) |                  |       |
| Events                                           | 262 (4.0)                               | 276 (4.4)               | 325 (5.2)               | 329 (5.4)          |                  |       |
| Age < 65 years                                   | Model 5                                 | Reference               | 1.69 (1.07-2.68)        | 1.69 (1.07-2.67)   | 1.72 (1.07-2.76) | 0.21  |
| Age ≥ 65 years                                   | Model 5                                 | Reference               | 1.04 (0.85-1.26)        | 1.16 (0.96-1.41)   | 1.08 (0.88-1.32) |       |
| Race: White                                      | Model 5                                 | Reference               | 1.23 (0.99-1.51)        | 1.35 (1.10-1.66)   | 1.18 (0.95-1.47) |       |
| Race: African American                           | Model 5                                 | Reference               | 0.84 (0.58-1.24)        | 0.96 (0.66-1.41)   | 1.09 (0.74-1.60) | 0.19  |
| Diabetes                                         | Model 5                                 | Reference               | 1.16 (0.95-1.42)        | 1.26 (1.03-1.54)   | 1.22 (0.99-1.50) | 0.93  |
| No Diabetes                                      | Model 5                                 | Reference               | 1.04 (0.69-1.54)        | 1.09 (0.73-1.62)   | 1.01 (0.67-1.52) |       |
| Congestive heart failure                         | Model 5                                 | Reference               | 1.15 (0.94-1.41)        | 1.28 (1.05-1.57)   | 1.25 (1.02-1.54) | 0.59  |
| No Congestive heart failure                      | Model 5                                 | Reference               | 1.07 (0.73-1.56)        | 1.05 (0.71-1.54)   | 0.87 (0.57-1.33) |       |
| RAASi                                            | Model 5                                 | Reference               | 1.12 (0.88-1.42)        | 1.27 (1.00-1.59)   | 1.18 (0.93-1.49) | 0.95  |
| No RAASi                                         | Model 5                                 | Reference               | 1.14 (0.86-1.50)        | 1.16 (0.87-1.54)   | 1.16 (0.86-1.57) |       |
| SPS                                              | Model 5                                 | Reference               | 1.32 (0.69-2.49)        | 1.05 (0.58-1.92)   | 1.25 (0.69-2.25) | 0.19  |
| No SPS                                           | Model 5                                 | Reference               | 1.11 (0.92-1.34)        | 1.32 (1.09-1.60)   | 1.13 (0.91-1.39) |       |
| eGFR < 15 ml/min <sup>2</sup> /1.73 <sup>2</sup> | Model 5                                 | Reference               | 1.02 (0.74-1.39)        | 1.18 (0.86-1.62)   | 0.85 (0.58-1.25) | 0.16  |
| eGFR ≥ 15 ml/min <sup>2</sup> /1.73 <sup>2</sup> | Model 5                                 | Reference               | 1.19 (0.96-1.48)        | 1.25 (1.01-1.56)   | 1.29 (1.04-1.61) |       |
| K measurements ≤ 11                              | Model 5                                 | Reference               | 1.29 (1.04-1.61)        | 1.44 (1.15-1.81)   | 0.98 (0.75-1.28) | 0.006 |
| K measurements > 11                              | Model 5                                 | Reference               | 0.91 (0.65-1.28)        | 1.05 (0.75-1.45)   | 1.19 (0.85-1.66) |       |

Data are presented as subhazard ratio (95% CI) unless otherwise specified.

Model adjusted for potassium intercept and slope over 1-year prelude, demographics (age, sex, race, marital status, smoking status), comorbidities (congestive heart failure, peripheral vascular disease, cerebrovascular disease, lung disease, peptic ulcer disease, paraplegia/hemiplegia, anemia, atrial fibrillation, hypertension, ischemic heart disease, diabetes, liver disease, malignancies), Charlson comorbidity index, cumulative length of hospitalizations, BMI over the 1-year prelude period, vascular access type, medications (RAASi, Na-polystyrene sulphonate, loop diuretics, potassium sparing diuretics, digoxin, beta blockers, calcium channel blockers, insulin, oral hypoglycemics, calcineurin inhibitors, trimethoprim, azole antifungals), average eGFR and number of potassium measurements over the 1-year prelude period.

BMI: body mass index; CHF: congestive heart failure; DM: diabetes mellitus; eGFR: estimated glomerular filtration rate; K: potassium; SPS; Na-polystyrene sulphonate; RAASi: renal-angiotensin-aldosterone system inhibitors



**Figure S1.** Sample selection criteria

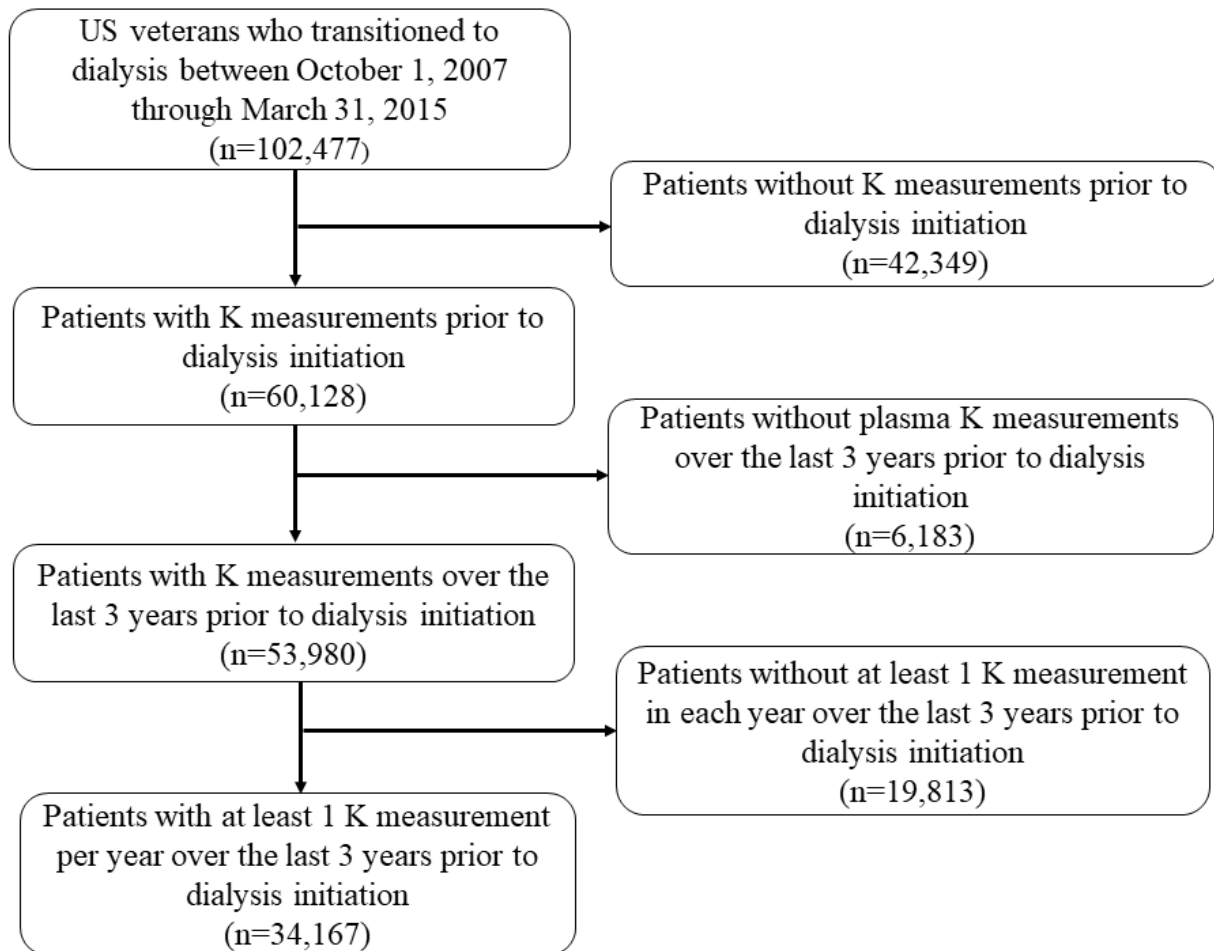

K: potassium; US: United States

**Figure S2.** Potassium variability calculation

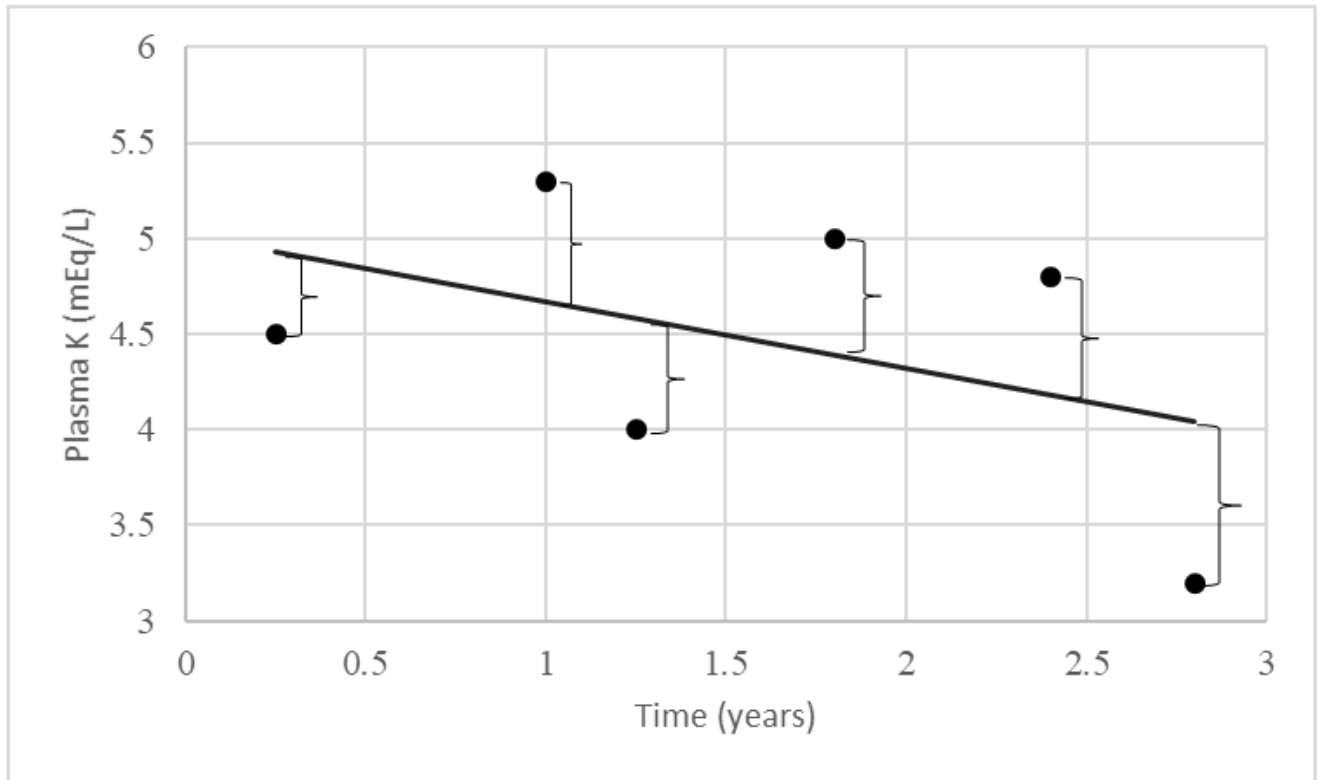

$$\text{Residual-SD} = \sqrt{\frac{\sum (K_{\text{obs}} - K_{\text{est}})^2}{n}}$$

Graph showing calculation of potassium variability

$K_{\text{obs}}$ : Observed K measurement;  $K_{\text{est}}$ : K measurement on the regression line estimated by the linear mixed-effects model;  $n$ : number of K measurements for each patient

K: potassium; SD: standard deviation

**Figure S3.** A histogram of (A) potassium variability estimated by linear mixed-effects regression with random intercept and slope, (B) potassium variability estimated by ordinary least squares regression, (C) difference between potassium variability estimated by linear mixed-effects regression and ordinary least squares regression

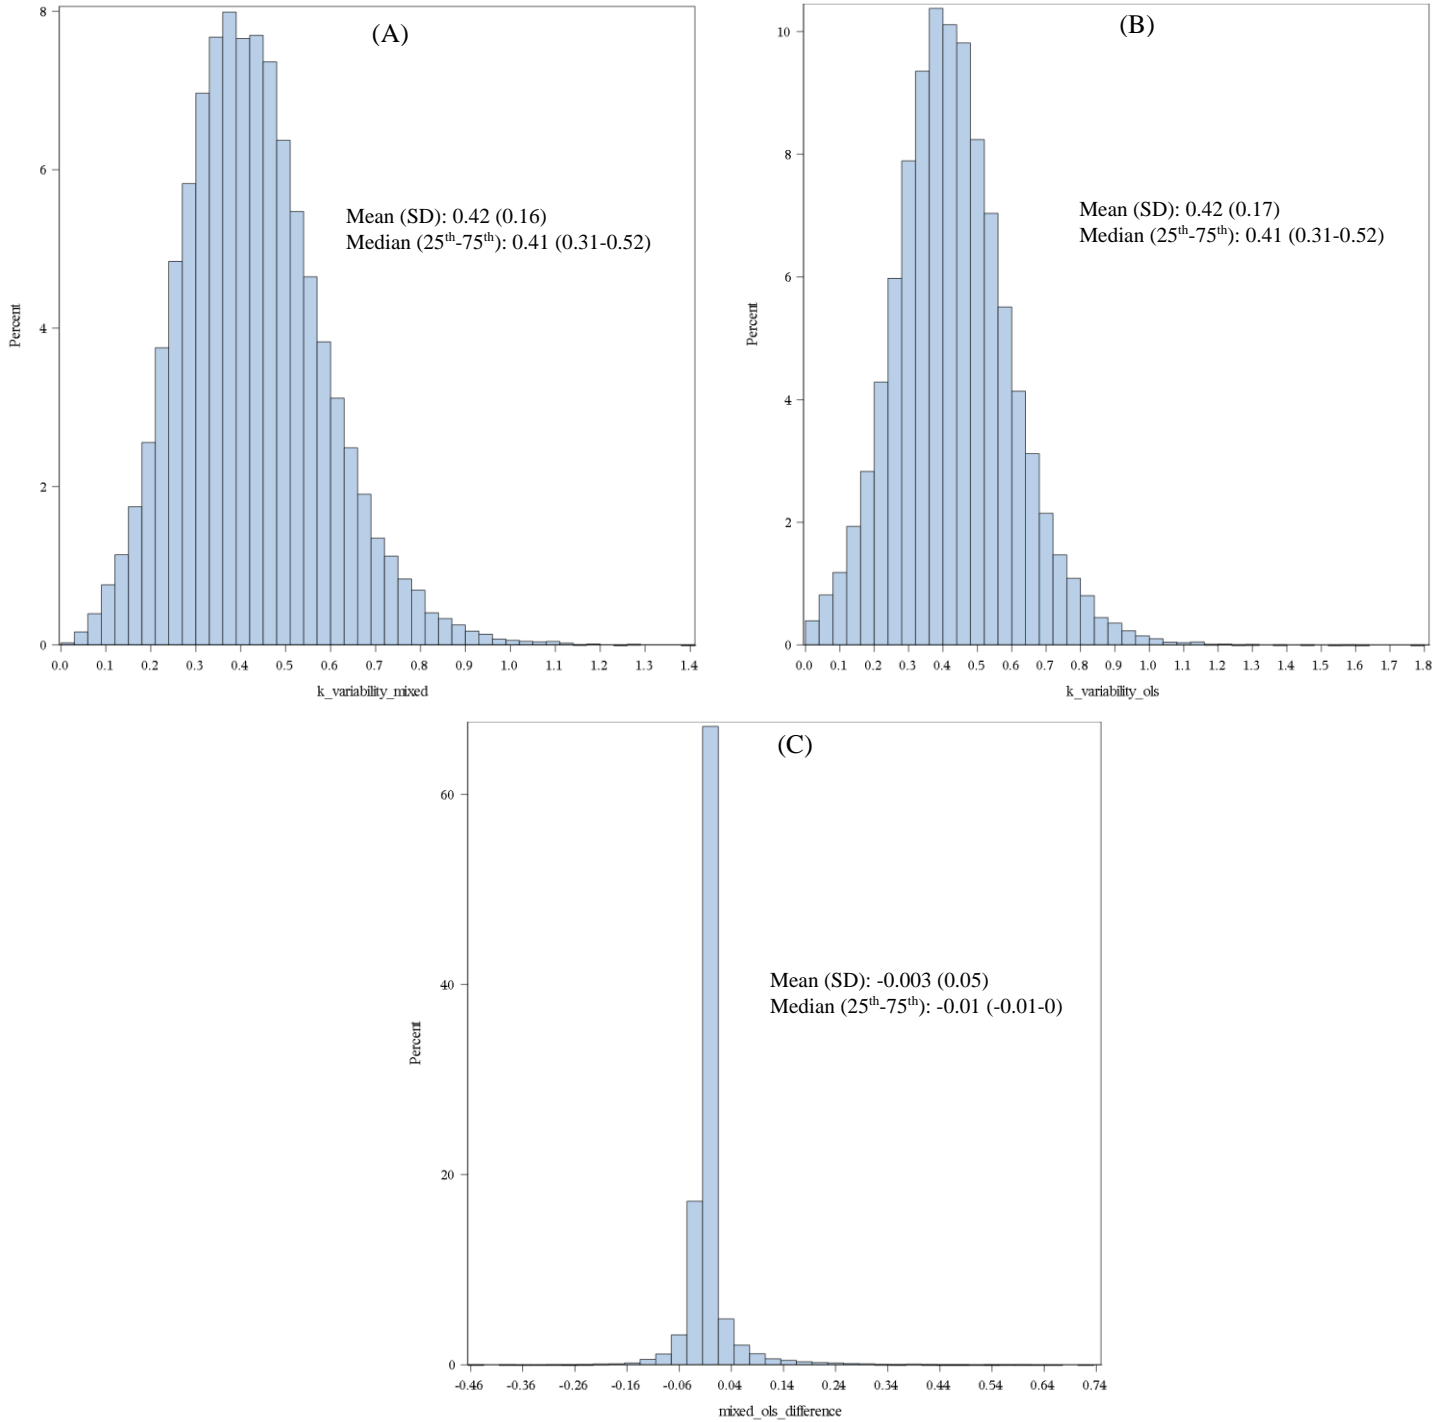

Histogram showing (A) potassium variability estimated by linear mixed-effects regression with random intercept and slope, (B) potassium variability estimated by ordinary least squares regression, (C) difference between

potassium variability estimated by linear mixed-effects regression and ordinary least squares regression i.e.  
difference= potassium variability<sub>mixedeffects</sub> – potassium variability<sub>OLS</sub>

K: potassium; OLS: ordinary least squares regression; SD: standard deviation

**Figure S4.** The association of potassium variability over the 3-year prelude with 6-month all-cause mortality following dialysis initiation

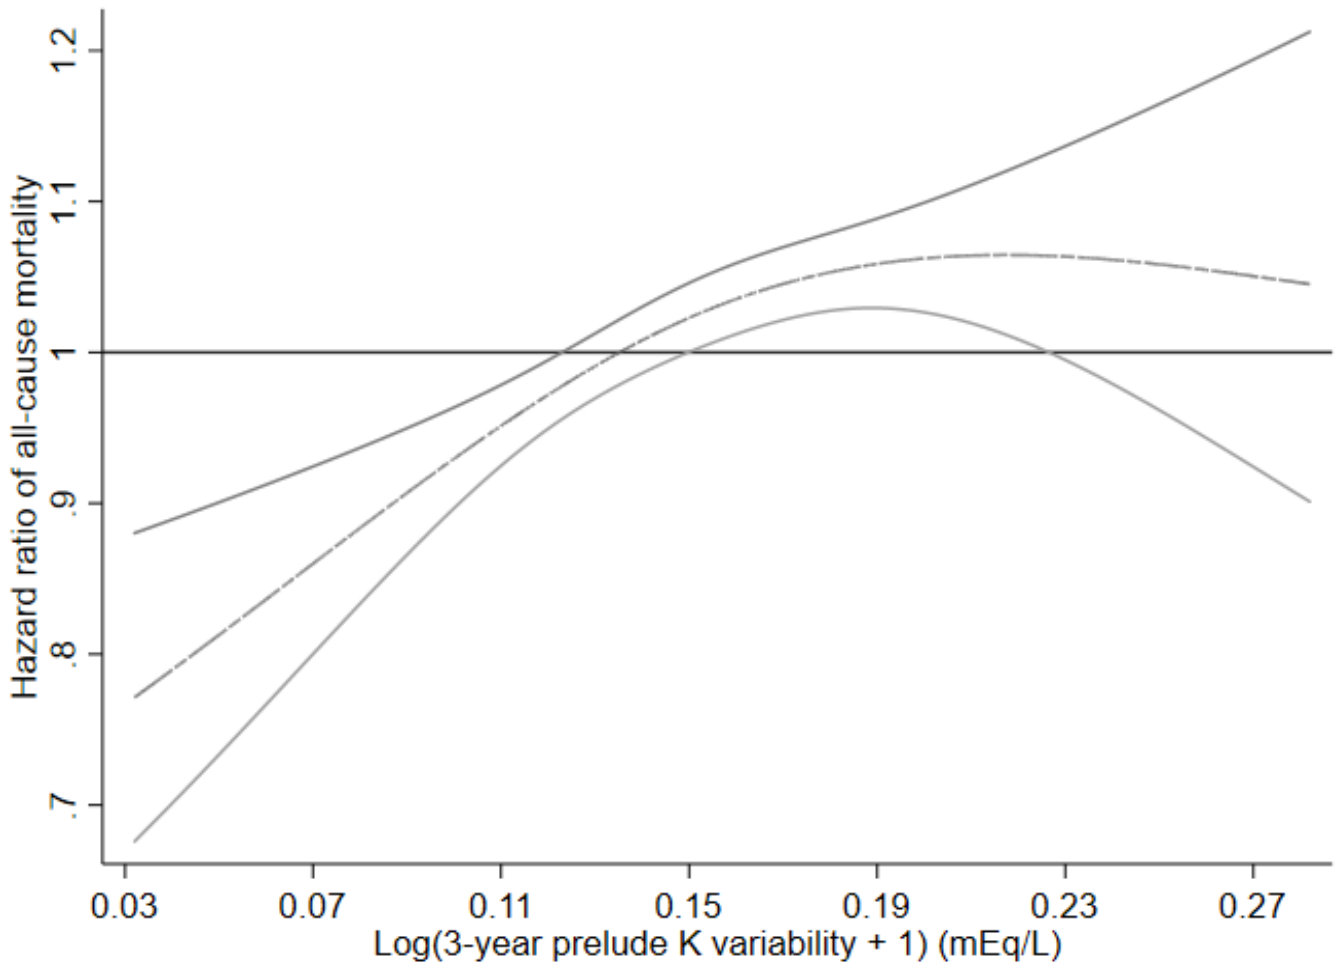

Dashed and solid lines represent hazard ratio and 95% confidence interval, respectively

The x-axis shows potassium variability levels, trimmed at 0.5% and 99.5%.

Model adjusted for potassium intercept and slope over 3-year prelude, demographics (age, sex, race, marital status, smoking status), comorbidities (congestive heart failure, peripheral vascular disease, cerebrovascular disease, lung disease, peptic ulcer disease, paraplegia/hemiplegia, anemia, atrial fibrillation, hypertension, ischemic heart disease, diabetes, liver disease, malignancies), Charlson comorbidity index, cumulative length of hospitalizations, BMI over the 3-year prelude period, vascular access type, medications (RAASi, Na-polystyrene sulphonate, loop diuretics, potassium sparing diuretics, digoxin, beta blockers, calcium channel blockers, insulin, oral hypoglycemics, calcineurin inhibitors, trimethoprim, azole antifungals), average eGFR and number of potassium measurements over the 3-year prelude period.

eGFR: estimated glomerular filtration rate; BMI: body mass index; K: potassium; RAASi: renal-angiotensin-aldosterone system inhibitors

**Figure S5.** The association of potassium variability over the 1-year prelude with 6-month all-cause mortality following dialysis initiation.

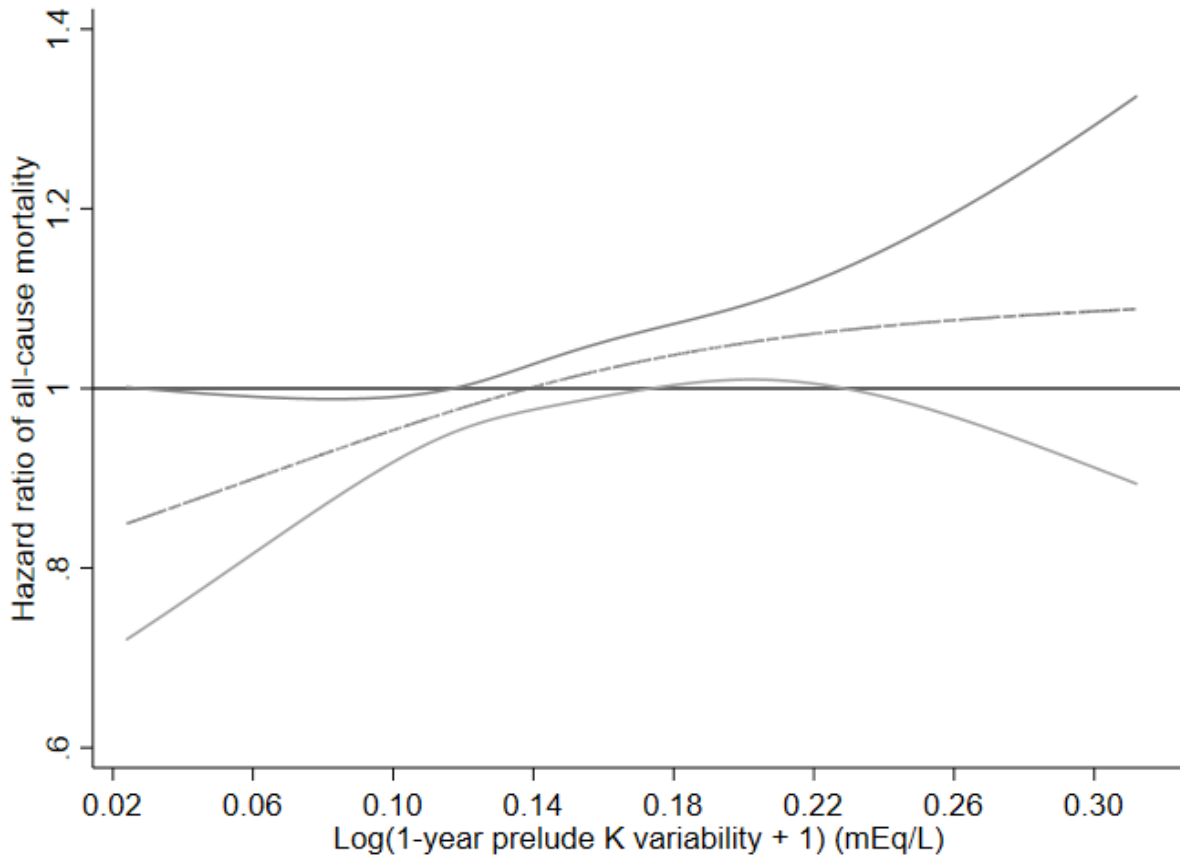

Dashed and solid lines represent hazard ratio and 95% confidence interval, respectively

The x-axis shows potassium variability levels, trimmed at 0.5% and 99.5%.

Model adjusted for potassium intercept and slope over 1-year prelude, demographics (age, sex, race, marital status, smoking status), comorbidities (congestive heart failure, peripheral vascular disease, cerebrovascular disease, lung disease, peptic ulcer disease, paraplegia/hemiplegia, anemia, atrial fibrillation, hypertension, ischemic heart disease, diabetes, liver disease, malignancies), Charlson comorbidity index, cumulative length of hospitalizations, BMI over the 1-year prelude period, vascular access type, medications (RAASi, Na-polystyrene sulphonate, loop diuretics, potassium sparing diuretics, digoxin, beta blockers, calcium channel blockers, insulin, oral hypoglycemics, calcineurin inhibitors, trimethoprim, azole antifungals), average eGFR and number of potassium measurements over the 1-year prelude period.

eGFR: estimated glomerular filtration rate; BMI: body mass index; K: potassium; RAASi: renal-angiotensin-aldosterone system inhibitors

**Figure S6.** The association of potassium variability over the 3-year prelude with 6-month cardiovascular mortality following dialysis initiation.

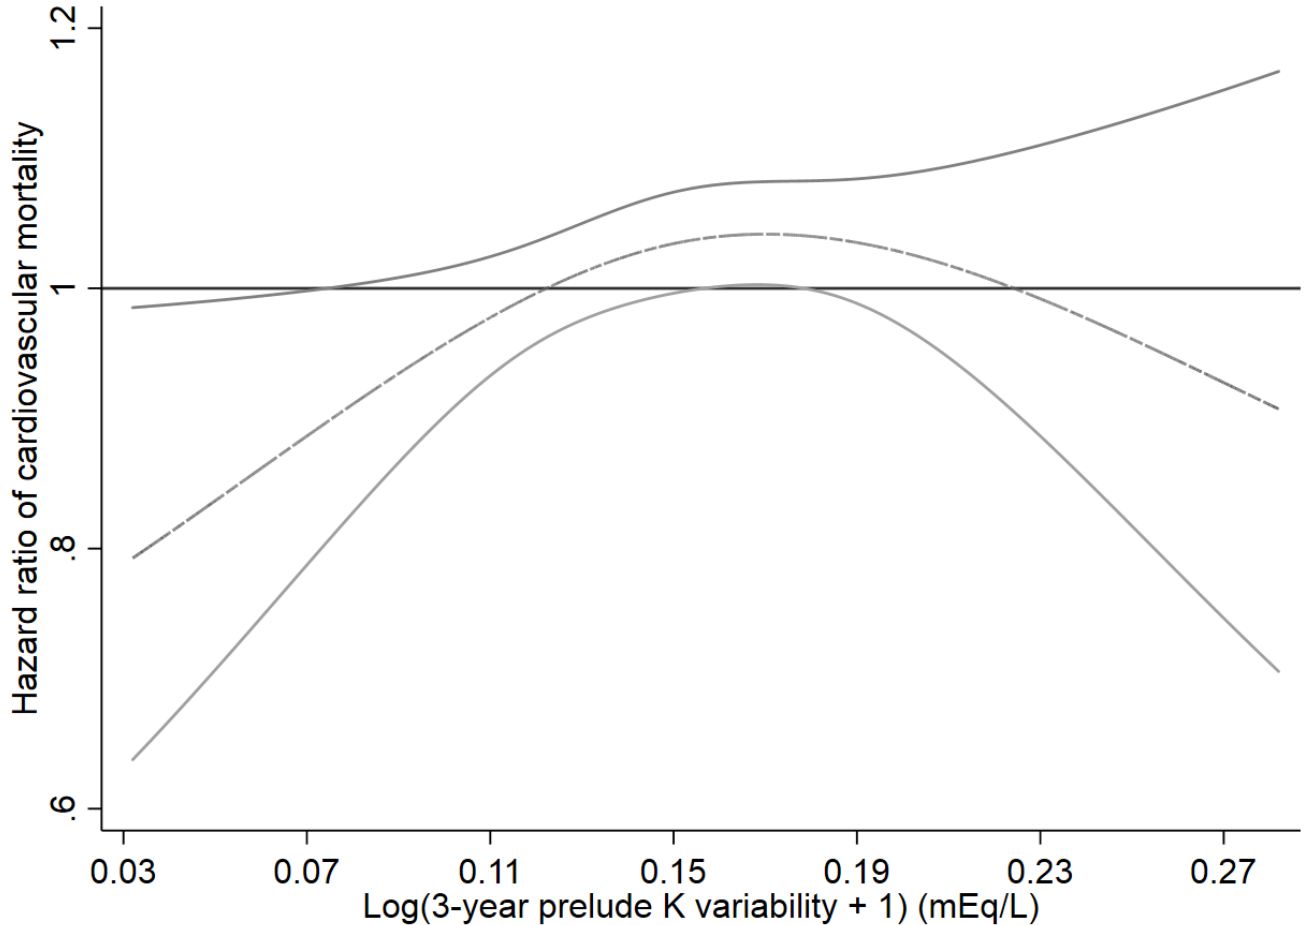

Dashed and solid lines represent hazard ratio and 95% confidence interval, respectively

The x-axis shows potassium variability levels, trimmed at 0.5% and 99.5%.

Model adjusted for potassium intercept and slope over 3-year prelude, demographics (age, sex, race, marital status, smoking status), comorbidities (congestive heart failure, peripheral vascular disease, cerebrovascular disease, lung disease, peptic ulcer disease, paraplegia/hemiplegia, anemia, atrial fibrillation, hypertension, ischemic heart disease, diabetes, liver disease, malignancies), Charlson comorbidity index, cumulative length of hospitalizations, BMI over the 3-year prelude period, vascular access type, medications (RAASi, Na-polystyrene sulphonate, loop diuretics, potassium sparing diuretics, digoxin, beta blockers, calcium channel blockers, insulin, oral hypoglycemics, calcineurin inhibitors, trimethoprim,azole antifungals), average eGFR and number of potassium measurements over the 3-year prelude period.

eGFR: estimated glomerular filtration rate; BMI: body mass index; K: potassium; RAASi: renal-angiotensin-aldosterone system inhibitors

**Figure S7.** The association of potassium variability over the 1-year prelude with 6-month cardiovascular mortality following dialysis initiation.

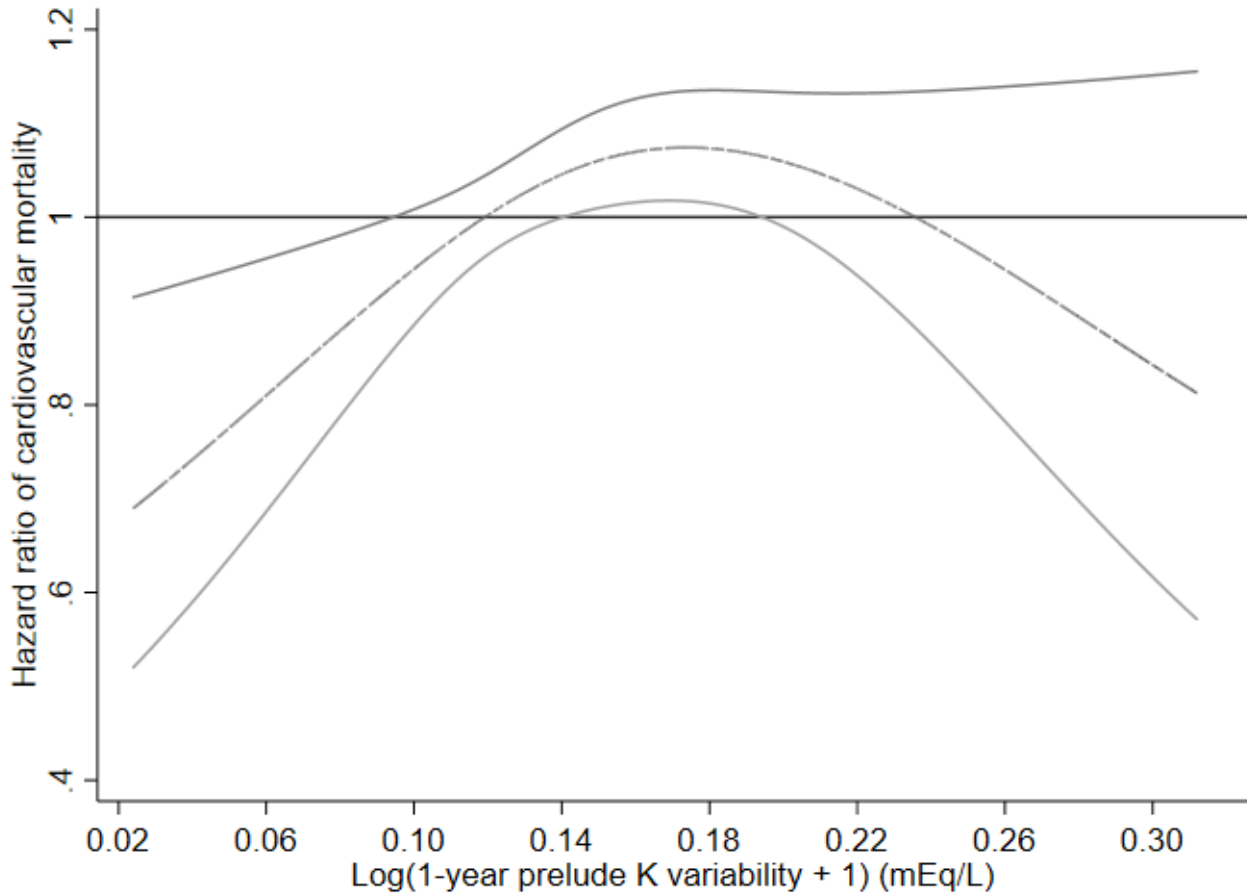

Dashed and solid lines represent hazard ratio and 95% confidence interval, respectively

Model adjusted for potassium intercept and slope over 1-year prelude, demographics (age, sex, race, marital status, smoking status), comorbidities (congestive heart failure, peripheral vascular disease, cerebrovascular disease, lung disease, peptic ulcer disease, paraplegia/hemiplegia, anemia, atrial fibrillation, hypertension, ischemic heart disease, diabetes, liver disease, malignancies), Charlson comorbidity index, cumulative length of hospitalizations, BMI over the 1-year prelude period, vascular access type, medications (RAASi, Na-polystyrene sulphonate, loop diuretics, potassium sparing diuretics, digoxin, beta blockers, calcium channel blockers, insulin, oral hypoglycemics, calcineurin inhibitors, trimethoprim, azole antifungals), average eGFR and number of potassium measurements over the 1-year prelude period.

eGFR: estimated glomerular filtration rate; BMI: body mass index; K: potassium; RAASi: renal-angiotensin-aldosterone system inhibitors
